# Supplementary material for: The impact of care environment on the mental health of orphaned, separated and street-connected children and adolescents in western Kenya: a prospective cohort analysis
Source: PubMed Central journal article supplement — BMJ Glob Health. 2021 Mar 31;6(3):e003644. doi: 10.1136/bmjgh-2020-003644 (PMC8016077; doi:10.1136/bmjgh-2020-003644), 2021-03-31
Supplement: bmjgh-2020-003644supp001.pdf [file bmjgh-2020-003644supp001.pdf]

**Table S1.** Unadjusted hazard ratios (HR) and 95% CIs of the effects of covariates on the primary outcomes of interest

|                                 | PTSD               | Depression         | Anxiety             | Suicidality        |
|---------------------------------|--------------------|--------------------|---------------------|--------------------|
| <b>Care Environment</b>         |                    |                    |                     |                    |
| FBC (ref)                       | 1                  | 1                  | 1                   | 1                  |
| Institution                     | 0.71 [0.59, 0.87]  | 0.38 [0.27, 0.52]  | 0.43 [0.34, 0.53]   | 0.8 [0.66, 0.97]   |
| Street Connected                | 8.21 [3.26, 20.65] | 6.01 [2.24, 16.08] | 11.01 [6.07, 19.97] | 6.89 [3.51, 13.53] |
| Age                             | 0.97 [0.91, 1.04]  | 0.95 [0.83, 1.08]  | 0.99 [0.74, 1.34]   | 0.92 [0.84, 1]     |
| Sex: Male                       | 1.17 [0.98, 1.4]   | 1.01 [0.72, 1.44]  | 0.86 [0.54, 1.37]   | 0.97 [0.82, 1.15]  |
| PTSD at baseline                | 2.87 [2.19, 3.75]  | 2.04 [1.48, 2.8]   | 2.35 [1.36, 4.06]   | 1.9 [1.24, 2.92]   |
| Depression at baseline          | 1.69 [0.98, 2.9]   | 4.12 [2.64, 6.4]   | 3.88 [2.22, 6.79]   | 2.19 [1.68, 2.85]  |
| Anxiety at baseline             | 1.91 [0.87, 4.2]   | 2.46 [1.58, 3.82]  | 8.12 [6.35, 10.39]  | 2.2 [1.24, 3.88]   |
| Suicidality at baseline         | 1.38 [1.08, 1.76]  | 1.94 [1.83, 2.04]  | 2.06 [1.68, 2.52]   | 2.77 [2.37, 3.23]  |
| Emotional abuse at baseline     | 1.68 [1.57, 1.8]   | 1.53 [1.39, 1.69]  | 1.98 [0.92, 4.26]   | 1.78 [1.58, 2]     |
| Physical abuse at baseline      | 1.97 [1.74, 2.24]  | 1.74 [1.44, 2.09]  | 2.06 [0.91, 4.66]   | 1.84 [1.58, 2.14]  |
| Sexual abuse at baseline        | 1.91 [1.32, 2.77]  | 2.02 [1.66, 2.47]  | 2.55 [1.1, 5.88]    | 1.85 [1.64, 2.09]  |
| Bullied at baseline             | 1.56 [1.4, 1.73]   | 1.34 [0.97, 1.86]  | 1.2 [0.85, 1.69]    | 1.43 [1.07, 1.91]  |
| Emotional abuse                 | 2.82 [2.54, 3.12]  | 2.72 [2.05, 3.62]  | 2.86 [1.73, 4.74]   | 2.62 [2.07, 3.3]   |
| Physical abuse                  | 3.18 [2.7, 3.74]   | 2.98 [2.65, 3.36]  | 3.48 [2.54, 4.77]   | 2.41 [2.33, 2.5]   |
| Sexual abuse                    | 3.91 [3.03, 5.05]  | 4.01 [2.53, 6.35]  | 3.21 [2.07, 4.97]   | 3.19 [2.62, 3.88]  |
| Bullied                         | 5.8 [5.35, 6.28]   | 2.42 [1.7, 3.46]   | 2.32 [2.19, 2.46]   | 2.66 [2.3, 3.07]   |
| <b>Orphan Status</b>            |                    |                    |                     |                    |
| Both parents alive (ref)        | 1                  | 1                  | 1                   | 1                  |
| Double Orphan                   | 1.05 [0.83, 1.32]  | 0.92 [0.65, 1.3]   | 0.91 [0.61, 1.35]   | 1.07 [0.79, 1.47]  |
| Maternal Orphan                 | 1.1 [0.8, 1.52]    | 1.04 [0.91, 1.21]  | 1.47 [1.06, 2.04]   | 1.09 [1.01, 1.17]  |
| Paternal Orphan                 | 1.26 [0.95, 1.68]  | 1.34 [1.14, 1.56]  | 1.38 [1.06, 1.79]   | 1.11 [0.86, 1.44]  |
| <b>Time in care at baseline</b> |                    |                    |                     |                    |
| Less than 6 months (ref)        | 1                  | 1                  | 1                   | 1                  |
| 6months - 2years                | 1.2 [0.39, 3.68]   | 1.03 [0.68, 1.56]  | 0.75 [0.31, 1.81]   | 1.52 [1.01, 2.28]  |
| 2-5 years                       | 0.87 [0.32, 2.39]  | 1.08 [0.64, 1.82]  | 0.4 [0.25, 0.62]    | 1.17 [0.66, 2.05]  |
| more than 5years                | 0.74 [0.26, 2.1]   | 0.93 [0.34, 2.54]  | 0.44 [0.18, 1.12]   | 1.05 [0.43, 2.53]  |
| all life                        | 0.97 [0.37, 2.58]  | 1.69 [1.23, 2.33]  | 0.63 [0.2, 2.01]    | 1.12 [0.65, 1.94]  |

**Table S2.** Unadjusted hazard ratios and 95% CIs of the effects of potentially mediating covariates on the primary outcomes restricted to participants 10 – 18 years of age in phase 2 of the cohort, living in either FBC or institutions

|                                   | PTSD              | Depression        | Anxiety            | Suicidality       |
|-----------------------------------|-------------------|-------------------|--------------------|-------------------|
| <b>Care Environment</b>           |                   |                   |                    |                   |
| FBC (ref)                         | 1                 | 1                 | 1                  | 1                 |
| Institution                       | 0.58 [0.46, 0.73] | 0.28 [0.28, 0.28] | 0.47 [0.38, 0.56]  | 0.58 [0.49, 0.69] |
| Age                               | 0.96 [0.87, 1.05] | 0.92 [0.78, 1.1]  | 0.96 [0.64, 1.44]  | 0.88 [0.76, 1]    |
| Sex: Male                         | 0.98 [0.78, 1.24] | 0.98 [0.58, 1.66] | 0.59 [0.24, 1.41]  | 0.92 [0.54, 1.56] |
| PTSD at baseline                  | 3.36 [2.01, 5.6]  | 2.13 [1.05, 4.31] | 1.65 [0.74, 3.72]  | 1.64 [1.02, 2.62] |
| Depression at baseline            | 1.56 [0.74, 3.29] | 3.35 [1.1, 10.17] | 2.41 [1.93, 3.01]  | 2.15 [1.23, 3.78] |
| Anxiety at baseline               | 1.96 [0.66, 5.85] | 2.03 [0.88, 4.66] | 7.05 [3.81, 13.05] | 1.75 [0.75, 4.09] |
| Suicidality at baseline           | 1.9 [1.71, 2.12]  | 2.29 [1.82, 2.89] | 2.06 [1.82, 2.34]  | 3.69 [2.6, 5.24]  |
| Emotional abuse at baseline       | 1.52 [1.32, 1.76] | 1.47 [0.97, 2.23] | 1.4 [0.5, 3.92]    | 1.8 [1.58, 2.04]  |
| Physical abuse at baseline        | 1.58 [1.42, 1.77] | 1.82 [1.64, 2.02] | 1.27 [1.09, 1.48]  | 1.87 [1.51, 2.33] |
| Sexual abuse at baseline          | 1.56 [1.49, 1.64] | 2.23 [1.04, 4.78] | 1.44 [0.89, 2.32]  | 2.14 [1.55, 2.95] |
| Bullied at baseline               | 1.26 [1.09, 1.47] | 0.9 [0.75, 1.07]  | 0.9 [0.48, 1.7]    | 1.08 [0.99, 1.19] |
| Emotional abuse                   | 2.57 [1.55, 4.27] | 3.49 [3.25, 3.76] | 2.33 [1.73, 3.15]  | 2.54 [1.96, 3.28] |
| Physical abuse                    | 3.45 [2.01, 5.92] | 4.7 [4.05, 5.45]  | 3.3 [2.69, 4.04]   | 2.6 [2.07, 3.25]  |
| Sexual abuse                      | 3.19 [2.42, 4.2]  | 5.64 [4.27, 7.46] | 2.46 [2.41, 2.51]  | 3.59 [3.43, 3.77] |
| Bullied                           | 6.64 [5.21, 8.46] | 3.47 [1.8, 6.68]  | 2 [1.48, 2.69]     | 2.61 [2.14, 3.17] |
| <b>Orphan Status</b>              |                   |                   |                    |                   |
| Double Orphan                     | 0.68 [0.55, 0.84] | 0.62 [0.31, 1.24] | 0.59 [0.58, 0.6]   | 0.71 [0.52, 0.96] |
| <b>Time in care at baseline</b>   |                   |                   |                    |                   |
| more than 5years                  | 1.15 [0.96, 1.37] | 1.18 [1.12, 1.24] | 1.01 [0.4, 2.56]   | 0.94 [0.77, 1.15] |
| Social Support                    | 0.56 [0.56, 0.57] | 0.5 [0.42, 0.58]  | 0.62 [0.52, 0.74]  | 0.6 [0.57, 0.62]  |
| <b>Basic Material Possessions</b> |                   |                   |                    |                   |
| All 3 basic material possessions  | 0.39 [0.33, 0.45] | 0.26 [0.17, 0.39] | 0.46 [0.28, 0.76]  | 0.29 [0.27, 0.32] |
| <b>Importance of Religion</b>     |                   |                   |                    |                   |
| Somewhat/Not Important            | 2.06 [1.29, 3.27] | 3.93 [2.61, 5.91] | 2.81 [2.29, 3.45]  | 2.87 [2.11, 3.91] |
| Spends time in Nature             | 0.74 [0.48, 1.13] | 0.66 [0.38, 1.16] | 0.84 [0.36, 1.92]  | 0.74 [0.55, 0.99] |
